# Supplementary material for: Genetic Diversity among Sugarcane Genotypes Based on Qualitative Traits
Source: Hindawi journal article supplement (doi:10.1155/2016/8909506), 2016-01-01
Supplement: f1 [file 8909506.f1.pdf]

## **Electronic Supplementary Material**

Title: Genetic Diversity of Qualitative Traits in Sugarcane Genotypes

Journal: Advances in Agriculture  
Hindawi Publishing Corporation

Authors: Esayas Tena<sup>1\*</sup>, Firew Mekbib<sup>2</sup> and Amsalu Ayana<sup>3</sup>

<sup>1</sup>Ethiopian Sugar Corporation, Research and Training, Eastern Shewa Zone, P.O.Box15, Wonji, Ethiopia  
E-mail:esutena11@gmail.com

<sup>2</sup>Haramaya University, College of Agriculture and Environmental Sciences, School of Plant Sciences, P.O.Box 138, DireDawa, Ethiopia,  
E-mail:firew.mekbib@gmail.com

<sup>3</sup>Integrated Seed Sector Development Ethiopia Program, Addis Ababa, Ethiopia, E-mail:ayana6a@yahoo.com

\*Corresponding author: Email: esutena11@gmail.com; Ethiopian Sugar Corporation, Research and Training; Eastern Shewa Zone, P.O.Box15, Wonji, Ethiopia

**Supplemental Table 1.** Passport data of local sugarcane germplasm collected during 2010/11 and used for the study

| Code No. | Vernacular Name                               | Region/Zone/Wereda/Kebele/Village                                     | Lat/Long                                          | Altitude (m) |
|----------|-----------------------------------------------|-----------------------------------------------------------------------|---------------------------------------------------|--------------|
| 1        | Nech Shenkora                                 | SNNP/Gurage/Absege/Nachakulit/Misreta                                 | 08 <sup>0</sup> 20.989'/37 <sup>0</sup> 33.954'   | 1521         |
| 2        | Bicha Shenkora/Weliso                         | SNNP/Gurage/Absege/Nachakulit/Misreta                                 | 08 <sup>0</sup> 20.989'/37 <sup>0</sup> 33.954'   | 1521         |
| 3        | Kay Shenkora                                  | SNNP/Gurage/Absege/Nachakulit/Misreta                                 | 08 <sup>0</sup> 20.989'/37 <sup>0</sup> 33.954'   | 1521         |
| 4        | Andegna Dereja Canada Shenkora                | SNNP/Silttie/Silttie/Balokeriso                                       | 07 <sup>0</sup> 58.907'/038 <sup>0</sup> 22.558'  | 1824         |
| 5        | Ye abesha shenkora                            | SNNP/Gamogofa/Bonke/Geresse Zala                                      | 05 <sup>0</sup> 54.307'/037 <sup>0</sup> 18.54'   | 2258         |
| 6        | Bicha Shenkora                                | SNNP/Gamogofa/Bonke/Geresse Zala/Tsophi                               | 05 <sup>0</sup> 54.476'/037 <sup>0</sup> 18.38'   | 2133         |
| 7        | Kay Sidancho                                  | SNNP/Sidama/Borecha/Yloubancho/Agoyicho                               | 06 <sup>0</sup> 56.060'/038 <sup>0</sup> 22.793'  | 2042         |
| 8        | Kay Shenkora                                  | SNNP/Gamogofa/Bonke/Geresse Zala/Tsophi                               | 05 <sup>0</sup> 54.476'/037 <sup>0</sup> 18.38'   | 2133         |
| 9        | Kay Shenkora/Huleteгна dereja canada Shenkora | SNNP/Silttie/Silttie/Balokeriso                                       | 07 <sup>0</sup> 58.907'/038 <sup>0</sup> 22.558'  | 1824         |
| 10       | Burabure Shenkora                             | SNNP/Gurage/Absege/Nachakulit/Misreta                                 | 08 <sup>0</sup> 20.989'/37 <sup>0</sup> 33.954'   | 1521         |
| 11       | Yegurage Shenkora/ Kay Shenkora               | SNNP/Gurage/Absege/Jejeba/Jejeba                                      | 08 <sup>0</sup> 16.298'/037 <sup>0</sup> 43.384'  | 1808         |
| 12       | Yejima Shenkora                               | SNNP/Gurage/Absege/Jejeba/Jejeba                                      | 08 <sup>0</sup> 16.298'/037 <sup>0</sup> 43.384'  | 1808         |
| 13       | Kay Shenkora                                  | SNNP/Silttie/Werabe/02 Kebele                                         | 07 <sup>0</sup> 49.933'/038 <sup>0</sup> 10.793'  | 2101         |
| 14       | Ye Abesha shenkora (Nech Shenkora)            | SNNP/South Omo/Debub Ari/Mester/Jagame                                | 05 <sup>0</sup> 59.202'/036 <sup>0</sup> 35.037'  | 1705         |
| 15       | Wolesh                                        | SNNP/South Omo/Debub Ari/Bazet/Ekzek                                  | 05 <sup>0</sup> 47. 213'/036 <sup>0</sup> 34.900' | 1436         |
| 16       | Wolesh/Tinkish                                | SNNP/South Omo/Debub Ari/Bazet/Ekzek                                  | 05 <sup>0</sup> 47. 213'/036 <sup>0</sup> 34.900' | 1436         |
| 18       | Nech (Arenguade) Ageda                        | SNNP/Konso Special Wereda/Gaserge Kebele                              | 05 <sup>0</sup> 96.038'/037 <sup>0</sup> 21.194'  | 1727         |
| 19       | Burabure Shenkora                             | SNNP/Konso Special Wereda/Busso Kebele                                | 05 <sup>0</sup> 18.495'/037 <sup>0</sup> 25.28'   | 1357         |
| 20       | Wonji                                         | SNNP/South Omo/Debub Ari/Bazet/Ekzek                                  | 05 <sup>0</sup> 47. 213'/036 <sup>0</sup> 34.900' | 1436         |
| 21       | Wolshi                                        | SNNP/South Omo/Debub Ari/Metser                                       | Collected from market                             |              |
| 22       | American                                      | SNNP/Sidama/Borecha/Yloubancho/Agoyicho                               | 06 <sup>0</sup> 55.908'/038 <sup>0</sup> 22.793'  | 2059         |
| 23       | Jambo                                         | SNNP/Sidama/Borecha/Yloubancho/Agoyicho                               | 06 <sup>0</sup> 56.060'/038 <sup>0</sup> 22.793'  | 2042         |
| 24       | Nech Sidancho                                 | SNNP/Sidama/Borecha/Yloubancho/Agoyicho                               | 06 <sup>0</sup> 56.060'/038 <sup>0</sup> 22.793'  | 2042         |
| 25       | Azaro, Kollo                                  | SNNP/Amaro special Wereda/ Jijola kebele/Kore village/Cheffa district | 05 <sup>0</sup> 40.446'/037 <sup>0</sup> 55.669'  | 1410         |
| 26       | Wonji                                         | SNNP/Amaro special Wereda/ Jijola kebele/Kore village/Cheffa district | 05 <sup>0</sup> 40.446'/037 <sup>0</sup> 55.669'  | 1410         |

Supplemental Table 1 continued

|    |                                           |                                                                       |                          |      |
|----|-------------------------------------------|-----------------------------------------------------------------------|--------------------------|------|
| 27 | Kembata                                   | SNNP/Gedeo/Wenago/Deko                                                | 06° 16.889'/038° 12.919' | 1914 |
| 28 | Nech Shenkora                             | SNNP/Amaro special Wereda/ Jijola kebele/Kore village/Cheffa district | 05° 40.446'/037° 55.669' | 1410 |
| 29 | Andegna dereja Wonji                      | SNNP/Wolayta/Damotgale/Gacheno                                        | 07° 02.280'/037° 55.072' | 1882 |
| 30 | Sidama/Yegamo Shenkora                    | SNNP/Amaro special Wereda/ Jijola kebele/Kore village/Cheffa district | 05° 40.446'/037° 55.669' | 1410 |
| 31 | Huletegna dereja Jambo kay                | Oromia/West Arsi/Wondo/Shesha kebele                                  | 07° 05.662'/038° 36.203' | 1705 |
| 32 | Andegna dereja Jambo kay                  | Oromia/West Arsi/Wondo/Shesha kebele                                  | 07° 05.662'/038° 36.203' | 1705 |
| 33 | Sostegna dereja Jambo kay/ Metfo Shenkora | Oromia/West Arsi/Wondo/Shesha kebele                                  | 07° 05.662'/038° 36.203' | 1705 |
| 34 | Moliso                                    | SNNP/Konta Special Wereda/ Cheka Bocha kebele/Bocha village           | 07° 05.953'/036° 39.495' | 1996 |
| 35 | Nech Shenkora                             | SNNP/Konta Special Wereda/ Cheka Bocha kebele                         | 07° 06.244'/036° 40.164' | 2105 |
| 36 | Tazma/Burabure                            | SNNP/Konta Special Wereda/ Cheka Bocha kebele/Bocha village           | 07° 05.953'/036° 39.495' | 1996 |
| 37 | Wolayta                                   | SNNP/Wolayta/Damotgale/Gacheno                                        | 07° 02.280'/037° 55.072' | 1882 |
| 38 | Kay Shenkora                              | SNNP/Dawro/Mareka/MedaKuli/Wushay                                     | 07° 00.612'/037° 12.285' | 2163 |
| 39 | Kay Shenkora                              | SNNP/Konta Special Wereda/ Cheka Bocha kebele/Bocha village           | 07° 05.953'/036° 39.495' | 1996 |
| 40 | Atena Moris                               | SSNP/Kembata Tembaro/Kacha Bira/Mesena                                | 07° 10.944'/037° 46.746' | 1838 |
| 41 | Dolche                                    | SNNP/Wolayta/Damotgale/Gacheno                                        | 07° 02.280'/037° 55.072' | 1882 |
| 42 | Kay Ageda Shenkora                        | SNNP/Halaba kulito Special Wereda/Alemtena                            | 07° 22.433'/038° 06.433' | 1797 |
| 43 | Moris                                     | SNNP/Halaba kulito Special Wereda/Alemtena                            | 07° 22.433'/038° 06.433' | 1797 |
| 44 | Bolfe                                     | SSNP/Kembata Tembaro/Kacha Bira/Mesena                                | 07° 10.944'/037° 46.746' | 1838 |
| 45 | Abesha                                    | SSNP/Kembata Tembaro/Kacha Bira/Mesena                                | 07° 10.944'/037° 46.746' | 1838 |
| 46 | Wotete                                    | SSNP/Kembata Tembaro/Kacha Bira/Mesena                                | 07° 10.944'/037° 46.746' | 1838 |
| 47 | Tazma/Burabure                            | SNNP/Dawro/Mareka/MedaKuli/Gendomeda                                  | 06° 58.977'/037° 11.493' | 1803 |
| 48 | Betam nech Shenkora                       | SNNP/Konta Special Wereda/ Cheka Bocha kebele                         | 07° 06.244'/036° 40.164' | 2105 |
| 49 | Wonji-1                                   | SSNP/Kembata Tembaro/ Kacha Bira/Wonko                                | 07° 12.316'/037° 50.843' | 1952 |
| 50 | Bishoftu                                  | SSNP/Kembata Tembaro/ Kacha Bira/Wonko                                | 07° 12.316'/037° 50.843' | 1952 |
| 51 | Wotet                                     | SNNP/Wolayta/Damotgale/ Gacheno                                       | 07° 02.280'/037° 55.072' | 1882 |
| 53 | Yeferenj shenkora                         | SNNP/Dawro/Mareka/MedaKuli/ Gendomeda                                 | 06° 58.977'/037° 11.493' | 1803 |
| 54 | Yemaytafit Shenkora                       | Oromia/Bale/Agarfa/Wabe                                               | Collected from market    |      |
| 55 | Kay Shenkora                              | Oromia/Arsi/Tena/Kereyuharzuna/ Debenshe                              | 07° 42.648'/039° 35.844' | 1848 |
| 56 | Wotete                                    | Oromia/Arsi/Tio/Bosha                                                 | Collected from market    |      |
| 57 | Shenkora Dima/Kay Shenkora                | Oromia/Bale/Agarfa/Alochefo                                           | 07° 23.154'/039° 46.271' | 1497 |
| 58 | Nech Shenkora/Shenkora Adi                | Oromia/Arsi/Tena/Kereyuharzuna/ Debenshe                              | 07° 42.648'/039° 35.844' | 1848 |
| 59 | Nech Shenkora                             | Oromia/Bale/Agarfa/Alochefo/ Odachefo                                 | 07° 23.154'/039° 46.271' | 1497 |

Supplemental Table 1 continued

|    |                                       |                                                  |                          |      |
|----|---------------------------------------|--------------------------------------------------|--------------------------|------|
| 60 | Moris                                 | Oromia/Arsi/Tena/Kereyuharzuna/ Debenshe         | 07° 42.648'/039° 35.844' | 1848 |
| 61 | Kay Shenkora                          | Oromia/Bale/Goro/Melkabuta/ Gadula Gola Dhertu   | 06° 58.539'/040° 35.398' | 1611 |
| 62 | Ye Abesha Shenkora/ Ye Oromo Shenkora | Oromia/West Shewa/Ambo/ Harutiro                 | 09° 07.613'/037° 47.724' | 2370 |
| 63 | Kay Shenkora/Wonji                    | Amhara/North Shewa/Debresina market              | 10° 04.978'/039° 53.606' | 1276 |
| 64 | Nech Shenkora                         | Amhara/North Shewa/Debresina market              | 10° 04.978'/039° 53.606' | 1276 |
| 65 | Tikur Ageda                           | Amhara/North Shewa/Kewet/Yelen                   | 10° 04.978'/039° 53.606' | 1235 |
| 66 | Nech Ageda                            | Amhara/North Shewa/Kewet/Yelen                   | 10° 04.978'/039° 53.606' | 1235 |
| 67 | Nech Kechacha Shenkora/ Getr          | Amhara/North Shewa/Kewet/Yelen                   | 10° 04.978'/039° 53.606' | 1235 |
| 68 | Ye Bako Shenkora                      | Oromia/West Shewa/Ambo/ Harutiro                 | 09° 07.613'/037° 47.724' | 2370 |
| 69 | Bula Shenkora                         | SNNP/Sheka/Masha/Shibo                           | 07° 44.641'/035° 28.511' | 2277 |
| 70 | Kay Shenkora/Kadiken                  | Gambella/Agnwak/Abobo/Aberimeti                  | 07° 55.825'/034° 43.133' | 507  |
| 71 | Bicha Shenkora                        | SNNP/Sheka/Masha/Beto                            | 07° 44.641'/035° 28.511' | 2277 |
| 72 | Shenkora Dima/Kay Shenkora            | Oromia/Illubabor/Bure/Wengawobe                  | 08° 09.189'/035° 27.382' | 1758 |
| 73 | Kay Shenkora Ageda                    | Oromia/Illubabor/Huka/Abyuadrere                 | 08° 13.781'/035° 15.796' | 1600 |
| 74 | Nech Shenkora/Kadiken                 | Gambella/Agnwak/Abobo/Aberimeti                  | 07° 55.825'/034° 43.133' | 507  |
| 75 | Shenkora                              | Gambella/Agnwak/Gog/Badabado                     | 07° 38.955'/034° 15.386' | 454  |
| 76 | Tikur Ageda                           | SNNP/Sheka/Yeki/Addisbirhan                      | 07° 11.212'/035° 26.095' | 1164 |
| 77 | Ye Kenya Ageda                        | SNNP/Sheka/Masha/Keja                            | 07° 50.149'/035° 28.159' | 1827 |
| 78 | Kay Ageda                             | SNNP/Sheka/Yeki/Addisbirhan                      | 07° 11.212'/035° 26.095' | 1164 |
| 79 | Kay Shenkora/ Dima                    | Oromia/Jima Zone/ Sekoru Wereda/ Habedode Kebele | Collected from market    |      |
| 80 | Ye Kenya Shenkora                     | SNNP/Sheka/Masha/Masha 01                        | 07° 44.641'/035° 28.511' | 2277 |
| 81 | Kay Ageda                             | SNNP/Kefa/Gimbo/Bonga 01                         | 07° 15.225'/036° 15.303' | 1792 |
| 82 | Tikur Ageda                           | SNNP/ Bench Majii /Mizan Teferi/ Hibret kebele   | 07° 00.061'/035° 35.802' | 1356 |
| 83 | Shembeko Ageda                        | SNNP/Kefa/Gimbo/Bonga 01                         | 07° 15.225'/036° 15.303' | 1792 |
| 84 | Tikur Ageda                           | Oromia/Illubabor/Bilonopa/Suli                   | 08° 26.252'/035° 36.267' | 1417 |
| 85 | Nech Shenkora                         | Oromia/Illubabor/Bilonopa/Dizy                   | 08° 23.138'/035° 36.249' | 1559 |
| 87 | Dalecha Shenkora                      | Oromia/Illubabor/Bilonopa/Suli                   | 08° 26.252'/035° 36.267' | 1417 |
| 89 | Kay Shenkora Ageda                    | Oromia/Illubabor/Bilonopa/Suli                   | 08° 26.252'/035° 36.267' | 1417 |
| 90 | Kay Shenkora                          | Oromia/Illubabor/Dureni/ Betelegebecha/Hadere    | 08° 29.860'/035° 45.110' | 1754 |
| 91 | Barbados                              | Oromia/Gimbi/Laloasabe/ Harochserdo Kebele       | Collected from market    |      |
| 92 | Ye Bako Shenkora                      | Oromia/Gimbi/Laloasabe/ Dengoro 01/Golbe         | 09° 16.130'/035° 40.804' | 1730 |
| 93 | Kay shenkora                          | Oromia/Gimbi/Laloasabe/ Dengoro 01/Golbe         | 09° 16.130'/035° 40.804' | 1730 |

Supplemental Table 1 continued

|     |                                 |                                                           |                          |      |
|-----|---------------------------------|-----------------------------------------------------------|--------------------------|------|
| 94  | Ageda Adi                       | Oromia/Kelem Welega/Sayo/ Gelanometi/Sembo                | 08° 32.704'/034° 43.594' | 1730 |
| 96  | Nech Shenkora                   | Oromia/Gimbi/Laloasabe/ Dengoro 01/Golbe                  | 09° 16.130'/035° 40.804' | 1730 |
| 97  | Tabor Shenkora                  | Oromia/Gimbi/Guliso/Wereseyo/ Kobera                      | 09° 10.256'/035° 31.592' | 1484 |
| 98  | Nech Shenkora/Ye Jima Shenkora  | Benshangulgumuz/Asosa/Bambasi Mender 49 (Sefera Tabia)    | 09° 49.520'/034° 41.766' | 1415 |
| 99  | Shilmu                          | Oromia/Kelem Welega/Dale Wabera/ Chanka Burore            | 08° 49.268'/035° 03.747' | 1470 |
| 100 | Nech Shenkora                   | Oromia/Kelem Welega/Hawagelan/ Haromechara                | 08° 43.544'/034° 59.141' | 1444 |
| 101 | Kay Shenkora                    | Oromia/West Shewa/Bakotibe/ Dembigobu                     | 09° 07.616'/037° 04.565' | 1620 |
| 103 | Nech Shenkora                   | Oromia/Kelem Welega/Hawagelan/ Haromechara                | 08° 43.544'/034° 59.141' | 1444 |
| 104 | Burabure Shenkora               | Benshangulgumuz/Asosa/ Megele 32 (Sefera Tabia)           | 10° 01.179'/034° 32.705' | 1478 |
| 105 | Nech Shenkora                   | Benshangulgumuz/Asosa/ Megele 32(Sefera Tabia)            | 10° 01.179'/034° 32.705' | 1478 |
| 106 | Abesha Shenkora/Adi             | Oromia/West Shewa/Bakotibe/ Dembigobu                     | 09° 07.616'/037° 04.565' | 1620 |
| 107 | Nech Shenkora                   | Amhara/Debub Gondar/Derra/ Mashenkoru/Misgano             | 11° 42.976'/037° 36.908' | 1993 |
| 110 | Yegojam Shenkora                | Amhara/Debub Gondar/Fogera/Wagtera                        | 11° 54.574'/037° 33.371' | 1797 |
| 111 | Tikur Shenkora                  | Amhara/West Gojam/Bahirdar Zuria/ Tis Abay/Gebere Mahiber | 11° 29.128'/037° 34.331' | 1642 |
| 113 | Shilmlm Sora                    | Amhara/West Gojam/Bahirdar Zuria/ Tis Abay/Gebere Mahiber | 11° 29.128'/037° 34.331' | 1642 |
| 114 | Ye Bure Shenkora                | Amhara/West Gojam/Bahirdar Zuria/ Tis Abay/Gebere Mahiber | 11° 29.128'/037° 34.331' | 1642 |
| 115 | Nech Ageda                      | Amhara/West Gojam/Jabitehnan/ Mankusa Abdegom/Endalah     | 10° 41.075'/037° 11.357' | 1941 |
| 116 | Tikur Shenkora                  | Amhara/West Gojam/Jabitehnan/ Mankusa Abdegom/Endalah     | 10° 41.075'/037° 11.357' | 1941 |
| 117 | Nech Shenkora/Sendel            | Amhara/West Gojam/Debub Achefer/ Lalibela/Azena           | 11° 28.590'/036° 57.027' | 1883 |
| 118 | Nech Yemailat Shenkora/ CO 1001 | Amhara/West Gojam/Debub Achefer/ Lalibela/Azena           | 11° 28.590'/036° 57.027' | 1883 |
| 119 | Bule/ B52                       | Amhara/West Gojam/Debub Achefer/ Lalibela/Azena           | 11° 28.590'/036° 57.027' | 1883 |
| 121 | Nech Shenkora/Sendel            | Amhara/West Gojam/Debub Achefer/ Lalibela/Azena           | 11° 28.590'/036° 57.027' | 1883 |
| 122 | Nech Shenkora                   | BenshangulGumuz/Metekel/Pawe/ Mender 28/29                | 11° 16.526'/036° 27.233' | 1097 |
| 123 | Kay Shenkora                    | Amhara/Awi/Guangua/Mota/ Menta Wuha                       | 10° 50.310'/036° 20.642' | 1532 |
| 124 | Kay Shenkora                    | BenshangulGumuz/Metekel/Pawe/ Mender 28/29                | 11° 16.526'/036° 27.233' | 1097 |
| 126 | Nech Shenkora                   | Amhara/Awi/Guangua/Mota/ Menta Wuha                       | 10° 50.310'/036° 20.642' | 1532 |
| 127 | Nech Shenkora/Bishoftu/ China   | Amhara/East Gojam/Dejen/Kurar/ Dengel                     | 10° 06.578'/038° 09.202' | 1820 |
| 128 | Gojame/Ye Gojam Ageda           | Amhara/East Gojam/Dejen/Kurar/ Ambayamit                  | 10° 06.490'/038° 09.185' | 1804 |
| 129 | Nech Shenkora                   | Amhara/East Gojam/Dejen/Kurar/ Dengel                     | 10° 06.578'/038° 09.202' | 1820 |
| 131 | Kay Shenkora/Bishoftu           | Amhara/East Gojam/Dejen/Kurar/ Dengel                     | 10° 06.578'/038° 09.202' | 1820 |
| 132 | Abadir                          | Amhara/East Gojam/Dejen/Kurar/ Ambayamit                  | 10° 06.490'/038° 09.185' | 1804 |

Supplemental Table 1 continued

|     |                         |                                                                  |                                 |      |
|-----|-------------------------|------------------------------------------------------------------|---------------------------------|------|
| 133 | Ye Fincha Shenkora      | Amhara/East Gojam/Basoliben/ Entemen Dejat                       | 10° 03.504'/037° 50.264'        | 2360 |
| 134 | Kay Ageda               | Amhara/East Gojam/Dejen/Dejen Town                               | Collected from market           |      |
| 136 | Bicha Shenkora          | Amhara/East Gojam/Dejen/Kurar/ Dengel                            | 10° 06.578'/038° 09.202'        | 1820 |
| 138 | Kay Ageda               | Tigray/Semen Mierab Tigray/Tach Koraro/ Semena/ Maymesreb        | 14° 11.602'/038° 20.897'        | 1927 |
| 139 | Kay Shenkora            | Tigray/Central Tigray/Tahtay Maychew/ Mayatsmi                   | 14° 04.680'/038° 33.366'        | 1993 |
| 140 | Kay Ageda               | Tigray/Semen Mierab Tigray/Tach Koraro/ Semena/ Maymesreb        | 14° 11.602'/038° 20.897'        | 1927 |
| 141 | Nech Shenkora           | Tigray/Central Tigray/Tahtay Maychew/ Mayatsmi                   | 14° 04.680'/038° 33.366'        | 1993 |
| 142 | Kay Ageda               | Tigray/Semen Mierab Tigray/Tach Koraro/ Semena/ Maymesreb        | 14° 11.602'/038° 20.897'        | 1927 |
| 143 | Nech Ageda/ Shenkora    | Amhara/Semen Welo/Gubalafto/ Woynye 011/Medakit                  | 11° 53.630'/039° 28.136'        | 2030 |
| 144 | Kay Ageda/ Shenkora     | Amhara/Semen Welo/Gubalafto/ Woynye 011/Medakit                  | 11° 53.630'/039° 28.136'        | 2030 |
| 145 | Kay Shenkora (Burabure) | Amhara/Semen Welo/Habru/09 kebele/ Ante                          | 11° 41.085'/039° 38.325'        | 1695 |
| 146 | Nech Ye Abesha Shenkora | Amhara/Semen Welo/Habru/09 kebele/ Ante                          | 11° 41.085'/039° 38.325'        | 1695 |
| 149 | Nech Tilik Shenkora     | Amhara/Debub Welo/Werebabo/02 kebele/Bulbulo/Aselel Prim. School | 11° 19.354'/039° 45.074'        | 2072 |
| 150 | Nech Shenkora           | Amhara/ Oromia special Zone/Kemissie/02 kebele/Ergi              | 10° 42.491'/039° 51.712'        | 1422 |
| 151 | Nech Ageda              | Amhara/Debub Welo/Borena/04 kebele/ Jimaye                       | 10° 45.172'/038° 45.974'        | 2687 |
| 152 | Nech Tinish Shenkora    | Amhara/Debub Welo/Werebabo/02 kebele/Bulbulo/Aselel Prim. School | 11° 19.354'/039° 45.074'        | 2072 |
| 153 | Ye Beskula Shenkora     | Amhara Region/South Welo Zone/ Legambo Wereda/Beskula Kebele     | Collected from market           |      |
| 154 | Nech Shenkora           | Amhara/ Oromia special Zone/Kemissie/02 kebele/Ergi              | 10° 42.491'/039° 51.712'        | 1422 |
| 155 | Nech Ye Abesha Shenkora | Amhara/Semen Welo/Meket/013 kebele/ Emamoz Fikrte Kirstos Gedam  | Brought by monks from Monastery |      |
| 156 | Nech Ageda/ Shenkora    | Amhara/Waghmra/Sekota/02 kebele/ Tiya                            | 12° 30.391'/039° 05.795'        | 1978 |
| 157 | Kay Ageda/Shenkora      | Tigray/Debub Tigray/Ofla/Zata                                    | 12° 30.924'/039° 16.477'        | 2134 |
| 158 | Ancha                   | Tigray/Debub Tigray/Ofla/Zata                                    | 12° 30.924'/039° 16.477'        | 2134 |
| 159 | Nech Shenkora           | Oromia/East Hararghe/Gurawa/01 Kebele/ Kera Sefer                | 09° 08.392'/041° 50.424'        | 2401 |
| 160 | Shenkora Adi            | Oromia/East Hararghe/Kurfachele/Dawe/                            | 09° 17.423'/041° 52.611'        | 1713 |
| 161 | Nech Shenkora           | Oromia/East Hararghe/Meta/Chelenko 02 kebele                     | 09° 23.875'/041° 33.670'        | 2179 |
| 162 | Shenkora Dima           | Oromia/East Hararghe/Kurfachele/Dawe/                            | 09° 17.423'/041° 52.611'        | 1713 |
| 163 | Nech Shenkora/Wonji     | Oromia/East Hararghe/Meta/Chelenko 02 kebele                     | 09° 23.875'/041° 33.670'        | 2179 |
| 164 | Yemilat Nech Shenkora   | Oromia/East Hararghe/Meta/Chelenko 02 kebele                     | 09° 23.875'/041° 33.670'        | 2179 |
| 165 | Nech Shenkora           | Harari/Erer Wereda/Dodota Kebele/ Mudir Village                  | 09° 19.353'/042° 13.030'        | 1376 |
| 166 | Burabure Shenkora       | Harari/Erer Wereda/Dodota Kebele/ Mudir Village                  | 09° 19.353'/042° 13.030'        | 1376 |

Supplemental Table 1 continued

|     |                         |                                                                |                           |      |
|-----|-------------------------|----------------------------------------------------------------|---------------------------|------|
| 167 | Kay Shenkora            | Oromia/East Hararghe/Babile/Ererguda/ Megida                   | 09° 14.783'/042° 15.022'  | 1315 |
| 169 | Guracha Shenkora/Tikur  | Oromia/East Hararghe/Babile/Ererguda/ Megida                   | 09° 14.783'/042° 15.022'  | 1315 |
| 170 | Kay Shenkora            | Oromia/East Hararghe/Kombolcha/Sibilu/ Gende Wedo Usman        | 09° 25.248'/042° 06.965'  | 2113 |
| 171 | Kay Shenkora/Burabure   | Oromia/East Hararghe/Gorogutu/ Erermedanchine/Ginge            | 09° 24.966'/041° 29.590'  | 1728 |
| 172 | Nech Shenkora           | Oromia/East Harerge/Babile/Ererguda/ Megida                    | 09° 14.783'/ 042° 15.022' | 1315 |
| 173 | Misrah                  | Oromia/West Hararghe/Gemechis/ Wemecho Dayo/Dekadabu           | 08° 45.408'/040° 53.285'  | 1496 |
| 174 | Wonji                   | Oromia/West Hararghe/Gemechis/ Wemecho Dayo/Dekadabu           | 08° 45.408'/040° 53.285'  | 1496 |
| 175 | Wonji/Bula/Shenkora Adi | Oromia/West Hararghe/Gubakoricha/ Oda Aneni 05 kebele/Nanofaro | 08° 56.717'/040° 33.308'  | 1972 |
| 176 | Shekole                 | Oromia/West Hararghe/Gubakoricha/ Oda Aneni 05 kebele/Nanofaro | 08° 56.717'/040° 33.308'  | 1972 |
| 177 | Holland                 | Oromia/West Hararghe/Darolebu                                  | 08° 36.352'/040° 19.278'  | 1751 |
| 178 | Bure                    | Oromia/West Hararghe/Gubakoricha/ Oda Aneni 05 kebele/Nanofaro | 08° 56.717'/040° 33.308'  | 1972 |
| 179 | Shenkora Dima           | Oromia/West Hararghe/Mesela/Lubudekeb/ Deneba                  | 09° 05.913'/041° 08.151'  | 1647 |
| 180 | Wonji                   | Oromia/West Hararghe/Mesela/Lubudekeb/ Deneba                  | 09° 05.913'/041° 08.151'  | 1647 |
| 181 | Gende Lega              | Oromia/West Hararghe/Gubakoricha/ Oda Aneni 05 kebele/Nanofaro | 08° 56.717'/040° 33.308'  | 1972 |
| 182 | Dikala                  | Oromia/East Hararghe/Deder/Kiyo (Nedi Gelan Sedi)/Tulu         | 09° 15.638'/041° 23.451'  | 1812 |
| 183 | Alaa                    | Oromia/East Hararghe/Deder/Kiyo (Nedi Gelan Sedi)/Tulu         | 09° 15.638'/041° 23.451'  | 1812 |
| 184 | Bure                    | Somali/Shinele/Erer/Bila                                       | 09° 31.774'/041° 24.965'  | 1192 |
| 185 | Bure                    | Somali/Shinele/Erer/ Gota                                      | Collected from market     |      |
| 186 | Shenkora Dima           | Somali/Shinele/Erer/Bila                                       | 09° 31.774'/041° 24.965'  | 1192 |
| 187 | Shenkora Adi            | Oromia/East Haraghe Zone/ Meta/ Ramis                          | Collected from market     |      |
| 188 | Aladi                   | Oromia/East Hararghe/Deder/Kiyo (Nedi Gelan Sedi)/Tulu         | 09° 15.638'/041° 23.451'  | 1812 |
| 189 | Erero                   | Oromia/East Hararghe/Deder/Kiyo (Nedi Gelan Sedi)/Tulu         | 09° 15.638'/041° 23.451'  | 1812 |
| 190 | Engda                   | Oromia/West Hararghe/Anchar/Chorchora/ Megala Deye Market      | 08° 47.508'/040° 17.063   | 1690 |
| 191 | Kay Shenkora            | Oromia/West Hararghe/Anchar/Chorchora/ Megala Deye Market      | 08° 47.508'/040° 17.063   | 1690 |

**Supplemental Table 2.** Introduced sugarcane genotypes in Ethiopia used for the study

| Code No. | Genotype | Country of origin | Year of introduction | Code No. | Genotype | Country of origin | Year of introduction | Code No. | Genotype | Country of origin    | Year of introduction |
|----------|----------|-------------------|----------------------|----------|----------|-------------------|----------------------|----------|----------|----------------------|----------------------|
| 192      | B3172    | Barbados          | 1983                 | 219      | B 51321  | Barbados          | 1974                 | 246      | BO 10    | Bihar-Orissa (India) | 1960                 |
| 193      | B35269   | Do                | 1983                 | 220      | B 51410  | Do                | 1983                 | 247      | BO 11    | Bihar-Orissa         | 1960                 |
| 194      | B37172   | Do                | 1956                 | 221      | B 51415  | Do                | 1974                 | 248      | BO 14    | Do                   | 1974                 |
| 195      | B39250   | Do                | 1983                 | 222      | B 52107  | Do                | 1974                 | 249      | BO 29    | Do                   | 1974                 |
| 196      | B39254   | Do                | 1983                 | 223      | B 52158  | Do                | 1970                 | 250      | BO 3     | Do                   | 1970                 |
| 197      | B 4098   | Do                | 1960                 | 224      | B 52298  | Do                | 1965                 | 251      | BO60349  | Do                   | Unknown              |
| 198      | B41211   | Do                | 1970                 | 225      | B 52313  | Do                | 1974                 | 252      | CB 36-14 | Campos (Brazil)      | 1974                 |
| 199      | B 4122   | Do                | Unknown              | 226      | B 53163  | Do                | 1974                 | 253      | CB 38-22 | Do                   | 1959                 |
| 200      | B 41227  | Do                | 1957                 | 227      | B 53164  | Do                | 1974                 | 254      | CB 38-39 | Do                   | 1959                 |
| 201      | B 42231  | Do                | 1957                 | 228      | B 5364   | Do                | 1965                 | 255      | CB 40-35 | Do                   | 1983                 |
| 202      | B 4362   | Do                | 1957                 | 229      | B 54142  | Do                | 1974                 | 257      | CB 41-76 | Do                   | 1970                 |
| 203      | B 4425   | Do                | 1974                 | 230      | B 5490   | Do                | 1974                 | 259      | CB 47-15 | Do                   | 1959                 |
| 204      | B 45154  | Do                | 1974                 | 231      | B 57133  | Do                | 1974                 | 260      | C 105-73 | Cuba                 | 2003                 |
| 205      | B 45154  | Do                | 1957                 | 232      | B 57141  | Do                | 1974                 | 263      | CO 245   | Coimbatore           | 1970                 |
| 206      | B 456    | Do                | Unknown              | 233      | B 80-250 | Do                | unknown              | 264      | CO 331   | Do                   | 1954                 |
| 207      | B 47386  | Do                | 1974                 | 234      | B 5736   | Do                | 1974                 | 265      | CO 419   | Do                   | 1954                 |
| 208      | B 47419  | Do                | 1957                 | 235      | B 5780   | Do                | 1974                 | 266      | CO 421   | Do                   | 1954                 |
| 209      | B 4744   | Do                | 1963                 | 236      | B 58230  | Do                | 1970                 | 267      | CO 434   | Do                   | 1970                 |
| 210      | B 4906   | Do                | 1974                 | 237      | B 59104  | Do                | 1983                 | 268      | CO 440   | Do                   | 1963                 |
| 211      | B 49119  | Do                | 1962                 | 238      | B 59212  | Do                | 1974                 | 269      | CO 449   | Do                   | 1957                 |
| 212      | B 49224  | Do                | 1974                 | 239      | B 59250  | Do                | Unknown              | 270      | CO 453   | Do                   | 1954                 |
| 213      | B 49388  | Do                | 1974                 | 240      | B 60125  | Do                | 1974                 | 271      | C120-78  | Cuba                 | 2003                 |
| 214      | B 50210  | Do                | 1974                 | 241      | B 60163  | Do                | 1974                 | 272      | CO 467   | Coimbatore           | 1957                 |
| 215      | B 51116  | Do                | 1970                 | 242      | B 60267  | Do                | 1974                 | 273      | CO 475   | Do                   | 1956                 |
| 216      | B 51129  | Do                | 1983                 | 243      | B 6109   | Do                | 1983                 | 274      | CO 513   | Do                   | 1960                 |
| 217      | B 51131  | Do                | 1970                 | 244      | B 6113   | Do                | 1983                 | 275      | CO 617   | Do                   | 1960                 |
| 218      | B 51132  | Do                | 1974                 | 245      | B 62347  | Do                | 1974                 | 276      | CO 622   | Do                   | 1960                 |



Supplemental Table 2 continued

| Code No. | Genotype | Country of origin | Year of introduction | Code No. | Genotype  | Country of origin | Year of introduction | Code No. | Genotype   | Country of origin | Year of introduction |
|----------|----------|-------------------|----------------------|----------|-----------|-------------------|----------------------|----------|------------|-------------------|----------------------|
| 278      | CO 677   | Coimbatore        | 1970                 | 308      | CO 1186   | Coimbatore        | 1974                 | 341      | CP69/1059  | Canal point       | 1983                 |
| 279      | CO 678   | Do                | 1960                 | 309      | CO 1190   | Do                | 1987                 |          |            |                   |                      |
| 280      | CO 680   | Do                | 1963                 | 310      | CO 1198   | Do                | 1987                 | 343      | CP 70/321  | Do                | 1983                 |
| 281      | CO 684   | Do                | 1970                 | 311      | CO 1202   | Do                | 1987                 | 344      | CP 71/396  | Do                | 1983                 |
| 282      | CO 718   | Do                | 1970                 | 312      | CO 1208   | Do                | 1987                 | 345      | CP 71/421  | Do                | 1983                 |
| 283      | CO 740   | Do                | 1962                 | 313      | CO 1230   | Do                | 1974                 | 346      | CP 1/441   | Do                | 1983                 |
| 286      | CO 765   | Do                | 1970                 | 314      | CO 6023   | Do                | 1974                 | 347      | CP 71/443  | Do                | 1984                 |
| 287      | CO 775   | Do                | 1960                 | 315      | CO 60191  | Do                | Unknown              | 348      | CP72/2083  | Do                | 1983                 |
| 288      | CO 785   | Do                | 1987                 | 317      | CP 29/291 | Canal point       | 1954                 | 349      | CP 73/341  | Do                | 1983                 |
| 289      | CO 798   | Do                | 1963                 | 318      | CP 29/320 | Do                | 1953                 | 350      | COS 109    | Unknown           | 1965                 |
| 290      | CO 810   | Do                | 1974                 | 319      | CP 36/105 | Do                | 1959                 | 351      | COS 245    | Do                | 1970                 |
| 291      | CO 842   | Do                | 1974                 | 321      | CP44/101  | Do                | 1957                 | 353      | COS 510    | Do                | 1962                 |
| 292      | CO 853   | Do                | 1974                 | 323      | CP 47/193 | Do                | Unknown              | 354      | COK 30     | Do                | 1970                 |
|          |          |                   |                      |          |           |                   |                      |          |            | Demerara          |                      |
| 293      | CO 911   | Do                | 1963                 | 324      | CP 48/103 | Do                | 1960                 | 355      | D 42/58    | (Guyana)          | 1974                 |
| 294      | CO 945   | Do                | 1970                 | 325      | CP 52/68  | Do                | 1974                 | 356      | D 141/46   | Do                | 1974                 |
| 295      | CO 954   | Do                | 1987                 | 326      | CP 53/18  | Do                | 1974                 | 357      | D 188/56   | Do                | 1974                 |
| 296      | CO 957   | Do                | 1965                 | 327      | M202/46   | Mauritius         | Unknown              | 359      | DB 228/57  | Do                | Unknown              |
| 297      | CO 961   | Do                | 1970                 | 328      | H48/4605  | Hawaii            | 1965                 | 360      | DB 377/60  | Do                | 1974                 |
| 298      | CO 967   | Do                | 1974                 | 330      | H49/3533  | Do                | 1974                 | 361      | DB 386/60  | Do                | 1974                 |
| 299      | CO 976   | Do                | 1965                 | 331      | M442/51   | Mauritius         | Unknown              | 362      | DB 414/60  | Do                | 1974                 |
| 300      | CO 991   | Do                | 1963                 | 332      | CP44/155  | Canal point       | Unknown              | 363      | DB 414/66  | Do                | 1983                 |
| 301      | CO 997   | Do                | 1967                 | 333      | CP 71-400 | Do                | Unknown              | 364      | Ebene 1/37 | Unknown           | 1957                 |
| 302      | CO 1001  | Do                | 1970                 | 334      | CP 60/23  | Do                | 1974                 | 365      | E 88/56    | Do                | 1974                 |
| 303      | CO 1007  | Do                | 1974                 | 335      | CP 61/37  | Do                | 1974                 | 366      | E 188/53   | Do                | 1974                 |
| 304      | CO 1148  | Do                | 1987                 | 337      | M165/38   | Mauritius         | unknown              | 367      | E 188/56   | Do                | 1974                 |
|          |          |                   |                      |          |           |                   |                      |          |            | Formosa,          |                      |
| 305      | CO 1157  | Do                | 1987                 | 338      | CP 65/357 | Canal point       | 1983                 | 368      | F 134      | (Taiwan)          | 1970                 |
| 306      | CO 1158  | Do                | 1987                 | 339      | CP 8/1026 | Do                | 1984                 | 370      | H 32/8560  | Hawaii (USA)      | 1960                 |
| 307      | CO 1177  | Do                | 1974                 | 340      | CP68/1067 | Do                | 1983                 | 371      | H 37/1933  | Do                | 1960                 |

Supplemental Table 2 continued

| Code No. | Genotype    | Country of origin | Year of introduction | Code No. | Genotype  | Country of origin | Year of introduction | Code No. | Genotype  | Country of origin | Year of introduction |
|----------|-------------|-------------------|----------------------|----------|-----------|-------------------|----------------------|----------|-----------|-------------------|----------------------|
| 372      | CO-602      | Coimbatore        | unknown              | 398      | N 7       | Natal (South A.)  | 1983                 | 426      | NCD 349   | Unknown           | 1970                 |
| 373      | H 38/4443   | Hawaii (USA)      | 1960                 | 399      | N 8       | Do                | 1983                 | 427      | NCD 376   | Do                | 1956                 |
| 374      | H 39/3633   | Do                | 1960                 | 400      | N 11      | Do                | 1987                 | 428      | NCO 382   | Do                | 1965                 |
| 377      | H 44/2364   | Do                | 1974                 | 401      | N 14      | Do                | 1980                 | 429      | PR 905    | Puerto Rico       | 1959                 |
| 378      | H 44/3098   | Do                | 1960                 | 402      | N 50/93   | Do                | 1965                 | 430      | PR 980    | Do                | 1965                 |
| 379      | HY8RID KS   | Unknown           | 1974                 | 403      | SP70-1284 | Unknown           | Unknown              | 431      | PR 1000   | Do                | 1960                 |
| 380      | L 60-14     | Louisiana, USA    | 1974                 | 404      | C86-12    | Cuba              | 2003                 | 432      | PR 1007   | Do                | 1970                 |
| 381      | L 60-25     | Do                | 1974                 | 405      | Q 70      | Natal             | 1965                 | 433      | PR 1013   | Do                | 1970                 |
|          |             |                   |                      |          |           | Reunion Island,   |                      |          |           |                   |                      |
| 382      | L 60-35     | Do                | Unknown              | 406      | R 48/3166 | (France)          | Unknown              | 434      | PR 1059   | Do                | 1974                 |
| 383      | L 60-40     | Do                | 1974                 | 407      | TDRJAN    | Australia         | 1956                 | 435      | PPQK 1604 | Do                | 1958                 |
|          |             |                   |                      |          |           |                   |                      |          |           | Proefstation      |                      |
|          |             |                   |                      |          |           |                   |                      |          |           | Cost Java         |                      |
| 384      | M 31/45     | Mauritius         | 1957                 | 408      | C90-501   | Cuba              | 2003                 | 436      | PDJ 28/78 | (Indonesia)       | Unknown              |
|          |             |                   |                      | 409      | WD II     | Local collection  | 1953                 | 437      | Pindar    | Unknown           | 1957                 |
|          |             |                   |                      |          | Yellow    |                   |                      |          |           | Queens land       |                      |
| 385      | M 53/263    | D0                | Unknown              | 410      | Cane      | Unknown           | Unknown              | 439      | Q 50      | (Austaralia)      | 1957                 |
| 386      | M 112/34    | Do                | 1960                 | 412      | C86-165   | Cuba              | 2003                 | 440      | SP70-1284 | Unknown           | Unknown              |
| 388      | M 147/44    | Do                | 1957                 | 415      | S 17      | Unknown           | Do                   | 441      | B80-505   | Barbados          | Unknown              |
| 389      | M 377/5     | Do                | Unknown              | 417      | SP70-1284 | Unknown           | Unknown              |          |           |                   |                      |
| 390      | Mex 52/29   | Mexico            | 1970                 | 418      | N 51/168  | Natal             | 1974                 |          |           |                   |                      |
| 391      | Mex 53/142  | Do                | 1970                 | 419      | N 51/539  | Do                | 1974                 |          |           |                   |                      |
| 392      | Mex 54/245  | Do                | 1970                 | 420      | N 52/219  | Do                | 1974                 |          |           |                   |                      |
| 393      | Mex 54/255  | Do                | 1970                 | 421      | N 53/216  | Do                | 1974                 |          |           |                   |                      |
| 394      | Mex 57/197  | Do                | 1970                 | 422      | N 55/805  | Do                | 1983                 |          |           |                   |                      |
| 395      | B80-250     | Barbados          | Unknown              | 423      | NCD 310   | Do                | 1953                 |          |           |                   |                      |
| 396      | Mex 59/1828 | Mexico            | 1983                 | 424      | NCO 334   | Do                | 1962                 |          |           |                   |                      |
| 397      | N 6         | Natal (South A.)  | 1983                 | 425      | 93-V1     | Unknown           | Unknown              |          |           |                   |                      |

Supplemental Table 3. Frequency distribution of different phenotypic classes for 16 qualitative characters in sugarcane by location of collection of local and country of sources of exotic genotypes

| Location                | Presence or absence of bud cushion |      | Relative degree of bud extension |      |      | Relative bud Shape |      |      |      |      |      |      |      |      |      |      |      |      | Canopy structure |      |      |      |      |      |   |  |
|-------------------------|------------------------------------|------|----------------------------------|------|------|--------------------|------|------|------|------|------|------|------|------|------|------|------|------|------------------|------|------|------|------|------|---|--|
|                         | 1                                  | 2    | 1                                | 2    |      | 3                  | 1    | 3    | 4    | 5    | 6    | 7    | 8    | 9    | 10   | 11   | 12   | 13   | 1                | 2    | 3    | 4    | 5    | 6    | 8 |  |
|                         |                                    |      |                                  |      |      |                    |      |      |      |      |      |      |      |      |      |      |      |      |                  |      |      |      |      |      |   |  |
| Amhara                  | 0.26                               | 0.74 | 0.05                             | 0.39 | 0.55 | 0.39               | 0.16 | 0.11 | 0.01 | 0.04 | 0.00 | 0.11 | 0.01 | 0.08 | 0.07 | 0.03 | 0.00 | 0.18 | 0.05             | 0.21 | 0.16 | 0.07 | 0.25 | 0.08 |   |  |
| Benshangul G.           | 0.3                                | 0.7  | 0.00                             | 0.40 | 0.60 | 0.10               | 0.20 | 0.10 | 0.00 | 0.20 | 0.10 | 0.10 | 0.00 | 0.10 | 0.10 | 0.00 | 0.00 | 0.10 | 0.00             | 0.10 | 0.40 | 0.30 | 0.10 | 0.00 |   |  |
| Gambella                | 0.5                                | 0.5  | 0.17                             | 0.33 | 0.50 | 0.00               | 0.17 | 0.17 | 0.00 | 0.17 | 0.00 | 0.17 | 0.00 | 0.00 | 0.17 | 0.17 | 0.00 | 0.50 | 0.00             | 0.17 | 0.00 | 0.00 | 0.33 | 0.00 |   |  |
| Harari                  | 0.5                                | 0.5  | 0.00                             | 0.25 | 0.75 | 0.75               | 0.00 | 0.00 | 0.00 | 0.00 | 0.00 | 0.00 | 0.25 | 0.00 | 0.00 | 0.00 | 0.00 | 0.00 | 0.25             | 0.00 | 0.50 | 0.00 | 0.25 | 0.00 |   |  |
| Oromia                  | 0.31                               | 0.69 | 0.03                             | 0.42 | 0.54 | 0.36               | 0.19 | 0.14 | 0.01 | 0.08 | 0.03 | 0.09 | 0.03 | 0.00 | 0.07 | 0.00 | 0.02 | 0.07 | 0.10             | 0.14 | 0.25 | 0.04 | 0.40 | 0.01 |   |  |
| SNNP                    | 0.25                               | 0.75 | 0.03                             | 0.46 | 0.51 | 0.28               | 0.17 | 0.15 | 0.04 | 0.09 | 0.00 | 0.06 | 0.06 | 0.03 | 0.12 | 0.01 | 0.00 | 0.18 | 0.05             | 0.14 | 0.11 | 0.06 | 0.44 | 0.03 |   |  |
| Somali                  | 0.33                               | 0.67 | 0.17                             | 0.33 | 0.50 | 0.33               | 0.17 | 0.33 | 0.00 | 0.00 | 0.00 | 0.00 | 0.17 | 0.00 | 0.00 | 0.00 | 0.00 | 0.00 | 0.17             | 0.33 | 0.17 | 0.17 | 0.17 | 0.00 |   |  |
| Tigray                  | 0.43                               | 0.57 | 0.21                             | 0.21 | 0.57 | 0.50               | 0.21 | 0.07 | 0.00 | 0.07 | 0.00 | 0.07 | 0.00 | 0.00 | 0.07 | 0.00 | 0.00 | 0.14 | 0.00             | 0.21 | 0.14 | 0.21 | 0.29 | 0.00 |   |  |
| Australia (Queens land) | 0.25                               | 0.75 | 0.00                             | 0.50 | 0.50 | 0.25               | 0.00 | 0.00 | 0.00 | 0.00 | 0.00 | 0.50 | 0.00 | 0.25 | 0.00 | 0.00 | 0.00 | 0.00 | 0.00             | 0.00 | 0.50 | 0.00 | 0.50 | 0.00 |   |  |
| Barbados                | 0.19                               | 0.81 | 0.10                             | 0.52 | 0.38 | 0.21               | 0.10 | 0.10 | 0.03 | 0.07 | 0.00 | 0.15 | 0.04 | 0.09 | 0.17 | 0.03 | 0.02 | 0.29 | 0.13             | 0.17 | 0.09 | 0.09 | 0.21 | 0.03 |   |  |
| Brazil (Campos)         | 0.42                               | 0.58 | 0.08                             | 0.33 | 0.58 | 0.17               | 0.25 | 0.17 | 0.00 | 0.08 | 0.00 | 0.25 | 0.00 | 0.00 | 0.00 | 0.00 | 0.08 | 0.25 | 0.17             | 0.08 | 0.00 | 0.08 | 0.42 | 0.00 |   |  |
| Cuba                    | 0.30                               | 0.70 | 0.10                             | 0.30 | 0.60 | 0.40               | 0.10 | 0.00 | 0.00 | 0.00 | 0.00 | 0.10 | 0.00 | 0.10 | 0.30 | 0.00 | 0.00 | 0.10 | 0.20             | 0.30 | 0.10 | 0.10 | 0.20 | 0.00 |   |  |
| Guyana (Demerara)       | 0.31                               | 0.69 | 0.06                             | 0.63 | 0.31 | 0.19               | 0.06 | 0.00 | 0.06 | 0.06 | 0.00 | 0.19 | 0.06 | 0.00 | 0.31 | 0.00 | 0.06 | 0.38 | 0.25             | 0.06 | 0.00 | 0.13 | 0.19 | 0.00 |   |  |
| India                   | 0.31                               | 0.69 | 0.09                             | 0.51 | 0.40 | 0.13               | 0.11 | 0.11 | 0.00 | 0.06 | 0.04 | 0.21 | 0.06 | 0.10 | 0.10 | 0.01 | 0.07 | 0.25 | 0.21             | 0.18 | 0.13 | 0.07 | 0.14 | 0.02 |   |  |
| Mauritius               | 0.25                               | 0.75 | 0.19                             | 0.50 | 0.31 | 0.06               | 0.19 | 0.19 | 0.00 | 0.06 | 0.00 | 0.13 | 0.13 | 0.06 | 0.00 | 0.00 | 0.19 | 0.44 | 0.06             | 0.13 | 0.06 | 0.00 | 0.31 | 0.00 |   |  |
| Mexico                  | 0.08                               | 0.92 | 0.17                             | 0.58 | 0.25 | 0.08               | 0.25 | 0.00 | 0.00 | 0.17 | 0.00 | 0.25 | 0.00 | 0.08 | 0.08 | 0.00 | 0.08 | 0.42 | 0.08             | 0.00 | 0.00 | 0.08 | 0.42 | 0.00 |   |  |
| Puertorico              | 0.07                               | 0.93 | 0.14                             | 0.71 | 0.14 | 0.00               | 0.21 | 0.00 | 0.00 | 0.07 | 0.00 | 0.43 | 0.07 | 0.07 | 0.14 | 0.00 | 0.00 | 0.64 | 0.00             | 0.21 | 0.07 | 0.00 | 0.07 | 0.00 |   |  |
| South A. Natal          | 0.21                               | 0.79 | 0.04                             | 0.64 | 0.32 | 0.07               | 0.04 | 0.21 | 0.00 | 0.11 | 0.00 | 0.21 | 0.14 | 0.07 | 0.11 | 0.00 | 0.04 | 0.46 | 0.04             | 0.07 | 0.18 | 0.11 | 0.14 | 0.00 |   |  |
| Unknown                 | 0.18                               | 0.82 | 0.05                             | 0.55 | 0.39 | 0.13               | 0.16 | 0.03 | 0.00 | 0.03 | 0.08 | 0.18 | 0.05 | 0.00 | 0.16 | 0.00 | 0.18 | 0.29 | 0.13             | 0.21 | 0.11 | 0.11 | 0.13 | 0.03 |   |  |
| USA                     | 0.36                               | 0.64 | 0.10                             | 0.56 | 0.34 | 0.13               | 0.20 | 0.09 | 0.01 | 0.04 | 0.03 | 0.19 | 0.10 | 0.01 | 0.17 | 0.00 | 0.03 | 0.23 | 0.24             | 0.20 | 0.13 | 0.03 | 0.16 | 0.01 |   |  |
| All                     | 0.27                               | 0.73 | 0.07                             | 0.48 | 0.45 | 0.23               | 0.15 | 0.11 | 0.01 | 0.07 | 0.02 | 0.14 | 0.05 | 0.05 | 0.12 | 0.01 | 0.04 | 0.23 | 0.12             | 0.16 | 0.14 | 0.07 | 0.26 | 0.02 |   |  |

Supplemental Table 3 continued

| Location                   | Relative shape of dewlap |      |      |      |      |      |      |      |      |      | Relative plant erectness |      |      |      |      |      | Relative degree of internode alignment |      |      |
|----------------------------|--------------------------|------|------|------|------|------|------|------|------|------|--------------------------|------|------|------|------|------|----------------------------------------|------|------|
|                            | 1                        | 2    | 4    | 5    | 6    | 7    | 8    | 9    | 10   | 11   | 4                        | 5    | 6    | 7    | 8    | 9    | 1                                      | 2    | 3    |
| Amhara                     | 0.03                     | 0.12 | 0.18 | 0.04 | 0.16 | 0.13 | 0.00 | 0.01 | 0.05 | 0.28 | 0.00                     | 0.01 | 0.08 | 0.17 | 0.34 | 0.39 | 0.22                                   | 0.46 | 0.32 |
| Benshangul G.              | 0.10                     | 0.40 | 0.10 | 0.00 | 0.10 | 0.20 | 0.00 | 0.00 | 0.00 | 0.10 | 0.00                     | 0.00 | 0.00 | 0.20 | 0.50 | 0.30 | 0.20                                   | 0.60 | 0.20 |
| Gambella                   | 0.17                     | 0.17 | 0.33 | 0.00 | 0.00 | 0.17 | 0.00 | 0.00 | 0.00 | 0.17 | 0.00                     | 0.00 | 0.17 | 0.00 | 0.00 | 0.83 | 0.00                                   | 0.83 | 0.17 |
| Harari                     | 0.25                     | 0.00 | 0.00 | 0.00 | 0.50 | 0.25 | 0.00 | 0.00 | 0.00 | 0.00 | 0.00                     | 0.00 | 0.00 | 0.25 | 0.25 | 0.50 | 0.00                                   | 0.50 | 0.50 |
| Oromia                     | 0.12                     | 0.15 | 0.08 | 0.06 | 0.18 | 0.15 | 0.03 | 0.02 | 0.04 | 0.16 | 0.05                     | 0.01 | 0.02 | 0.23 | 0.34 | 0.36 | 0.32                                   | 0.45 | 0.23 |
| SNNP                       | 0.12                     | 0.18 | 0.05 | 0.04 | 0.06 | 0.22 | 0.02 | 0.04 | 0.02 | 0.25 | 0.03                     | 0.00 | 0.04 | 0.15 | 0.39 | 0.39 | 0.32                                   | 0.43 | 0.25 |
| Somali                     | 0.00                     | 0.00 | 0.33 | 0.00 | 0.33 | 0.17 | 0.00 | 0.00 | 0.00 | 0.17 | 0.00                     | 0.00 | 0.00 | 0.17 | 0.33 | 0.50 | 0.67                                   | 0.17 | 0.17 |
| Tigray                     | 0.14                     | 0.21 | 0.14 | 0.00 | 0.07 | 0.00 | 0.00 | 0.00 | 0.00 | 0.43 | 0.00                     | 0.00 | 0.07 | 0.29 | 0.36 | 0.29 | 0.21                                   | 0.36 | 0.43 |
| Australia<br>(Queens land) | 0.00                     | 0.25 | 0.25 | 0.00 | 0.00 | 0.25 | 0.00 | 0.00 | 0.00 | 0.25 | 0.00                     | 0.00 | 0.00 | 0.25 | 0.25 | 0.50 | 0.00                                   | 0.75 | 0.25 |
| Barbados                   | 0.07                     | 0.17 | 0.08 | 0.00 | 0.13 | 0.20 | 0.04 | 0.04 | 0.03 | 0.25 | 0.06                     | 0.02 | 0.01 | 0.08 | 0.21 | 0.62 | 0.24                                   | 0.52 | 0.24 |
| Brazil (Campos)            | 0.08                     | 0.08 | 0.08 | 0.17 | 0.17 | 0.08 | 0.00 | 0.00 | 0.00 | 0.33 | 0.00                     | 0.00 | 0.00 | 0.08 | 0.42 | 0.50 | 0.33                                   | 0.50 | 0.17 |
| Cuba                       | 0.00                     | 0.20 | 0.00 | 0.00 | 0.00 | 0.50 | 0.00 | 0.00 | 0.10 | 0.20 | 0.00                     | 0.00 | 0.00 | 0.00 | 0.20 | 0.80 | 0.10                                   | 0.60 | 0.30 |
| Guyana<br>(Demerara)       | 0.00                     | 0.19 | 0.06 | 0.06 | 0.31 | 0.19 | 0.00 | 0.00 | 0.00 | 0.19 | 0.00                     | 0.00 | 0.00 | 0.06 | 0.06 | 0.88 | 0.25                                   | 0.38 | 0.38 |
| India                      | 0.08                     | 0.14 | 0.10 | 0.04 | 0.13 | 0.29 | 0.04 | 0.04 | 0.00 | 0.13 | 0.02                     | 0.00 | 0.01 | 0.08 | 0.19 | 0.71 | 0.31                                   | 0.48 | 0.21 |
| Mauritius                  | 0.13                     | 0.38 | 0.06 | 0.13 | 0.13 | 0.06 | 0.00 | 0.00 | 0.06 | 0.06 | 0.06                     | 0.00 | 0.13 | 0.38 | 0.13 | 0.31 | 0.25                                   | 0.50 | 0.25 |
| Mexico                     | 0.08                     | 0.17 | 0.00 | 0.17 | 0.08 | 0.17 | 0.17 | 0.00 | 0.08 | 0.08 | 0.00                     | 0.00 | 0.00 | 0.08 | 0.58 | 0.33 | 0.42                                   | 0.42 | 0.17 |
| Puertorico                 | 0.14                     | 0.00 | 0.14 | 0.00 | 0.14 | 0.36 | 0.14 | 0.00 | 0.00 | 0.07 | 0.00                     | 0.00 | 0.00 | 0.21 | 0.14 | 0.64 | 0.36                                   | 0.36 | 0.29 |
| South A. Natal             | 0.07                     | 0.07 | 0.14 | 0.00 | 0.14 | 0.18 | 0.00 | 0.07 | 0.00 | 0.32 | 0.00                     | 0.00 | 0.00 | 0.00 | 0.25 | 0.75 | 0.36                                   | 0.43 | 0.21 |
| Unknown                    | 0.05                     | 0.16 | 0.08 | 0.03 | 0.13 | 0.21 | 0.00 | 0.11 | 0.00 | 0.24 | 0.00                     | 0.00 | 0.03 | 0.03 | 0.18 | 0.76 | 0.32                                   | 0.34 | 0.34 |
| USA                        | 0.07                     | 0.17 | 0.10 | 0.10 | 0.13 | 0.21 | 0.03 | 0.06 | 0.00 | 0.13 | 0.00                     | 0.00 | 0.01 | 0.10 | 0.23 | 0.66 | 0.19                                   | 0.59 | 0.23 |
| All                        | 0.08                     | 0.16 | 0.10 | 0.04 | 0.13 | 0.20 | 0.03 | 0.03 | 0.02 | 0.20 | 0.02                     | 0.01 | 0.03 | 0.13 | 0.27 | 0.54 | 0.28                                   | 0.47 | 0.25 |

Supplemental Table 3 continued

| Location                   | Relative internode shape |      |      |      |      |      | Color of the leaves |      |      | Type of auricle |      |      |      |      |      |      |      |      |
|----------------------------|--------------------------|------|------|------|------|------|---------------------|------|------|-----------------|------|------|------|------|------|------|------|------|
|                            | 1                        | 2    | 3    | 4    | 5    | 6    | 1                   | 2    | 7    | 1               | 2    | 3    | 4    | 5    | 6    | 7    | 8    | 9    |
| Amhara                     | 0.33                     | 0.16 | 0.04 | 0.11 | 0.00 | 0.37 | 0.32                | 0.55 | 0.13 | 0.12            | 0.26 | 0.01 | 0.03 | 0.05 | 0.00 | 0.01 | 0.30 | 0.21 |
| Benshangul G.              | 0.20                     | 0.20 | 0.00 | 0.00 | 0.10 | 0.50 | 0.10                | 0.80 | 0.10 | 0.30            | 0.00 | 0.00 | 0.10 | 0.20 | 0.00 | 0.00 | 0.20 | 0.20 |
| Gambella                   | 0.00                     | 0.00 | 0.00 | 0.00 | 0.00 | 1.00 | 0.50                | 0.50 | 0.00 | 0.17            | 0.17 | 0.00 | 0.00 | 0.00 | 0.00 | 0.00 | 0.33 | 0.33 |
| Harari                     | 0.00                     | 0.25 | 0.00 | 0.00 | 0.00 | 0.75 | 0.00                | 0.75 | 0.25 | 0.25            | 0.50 | 0.00 | 0.00 | 0.00 | 0.00 | 0.00 | 0.25 | 0.00 |
| Oromia                     | 0.31                     | 0.09 | 0.04 | 0.07 | 0.03 | 0.45 | 0.23                | 0.73 | 0.04 | 0.28            | 0.16 | 0.01 | 0.03 | 0.05 | 0.01 | 0.02 | 0.25 | 0.19 |
| SNNP                       | 0.26                     | 0.18 | 0.03 | 0.11 | 0.04 | 0.38 | 0.18                | 0.70 | 0.12 | 0.20            | 0.29 | 0.02 | 0.07 | 0.06 | 0.01 | 0.03 | 0.12 | 0.20 |
| Somali                     | 0.33                     | 0.17 | 0.50 | 0.00 | 0.00 | 0.00 | 0.33                | 0.67 | 0.00 | 0.67            | 0.00 | 0.00 | 0.00 | 0.00 | 0.00 | 0.17 | 0.17 | 0.00 |
| Tigray                     | 0.29                     | 0.14 | 0.00 | 0.00 | 0.00 | 0.57 | 0.21                | 0.71 | 0.07 | 0.14            | 0.07 | 0.00 | 0.14 | 0.21 | 0.00 | 0.00 | 0.21 | 0.21 |
| Australia<br>(Queens land) | 0.00                     | 0.00 | 0.00 | 0.25 | 0.25 | 0.50 | 0.00                | 0.75 | 0.25 | 0.50            | 0.25 | 0.00 | 0.00 | 0.00 | 0.00 | 0.00 | 0.25 | 0.00 |
| Barbados                   | 0.19                     | 0.19 | 0.05 | 0.04 | 0.08 | 0.46 | 0.17                | 0.63 | 0.21 | 0.21            | 0.18 | 0.01 | 0.05 | 0.04 | 0.00 | 0.00 | 0.27 | 0.25 |
| Brazil (Campos)            | 0.25                     | 0.08 | 0.17 | 0.00 | 0.00 | 0.50 | 0.08                | 0.83 | 0.08 | 0.25            | 0.17 | 0.00 | 0.08 | 0.08 | 0.00 | 0.00 | 0.17 | 0.25 |
| Cuba                       | 0.10                     | 0.20 | 0.00 | 0.10 | 0.20 | 0.40 | 0.10                | 0.80 | 0.10 | 0.30            | 0.10 | 0.00 | 0.20 | 0.00 | 0.00 | 0.00 | 0.30 | 0.10 |
| Guyana<br>(Demerara)       | 0.25                     | 0.19 | 0.13 | 0.00 | 0.19 | 0.25 | 0.19                | 0.44 | 0.38 | 0.13            | 0.13 | 0.06 | 0.00 | 0.13 | 0.06 | 0.13 | 0.31 | 0.06 |
| India                      | 0.21                     | 0.19 | 0.08 | 0.02 | 0.17 | 0.33 | 0.14                | 0.62 | 0.24 | 0.18            | 0.11 | 0.02 | 0.04 | 0.03 | 0.00 | 0.03 | 0.33 | 0.27 |
| Mauritius                  | 0.13                     | 0.13 | 0.00 | 0.38 | 0.06 | 0.31 | 0.25                | 0.56 | 0.19 | 0.13            | 0.13 | 0.00 | 0.13 | 0.00 | 0.00 | 0.00 | 0.31 | 0.31 |
| Mexico                     | 0.33                     | 0.08 | 0.00 | 0.00 | 0.08 | 0.50 | 0.50                | 0.33 | 0.17 | 0.17            | 0.08 | 0.00 | 0.00 | 0.00 | 0.08 | 0.00 | 0.00 | 0.67 |
| Puertorico                 | 0.21                     | 0.14 | 0.00 | 0.00 | 0.14 | 0.50 | 0.14                | 0.36 | 0.50 | 0.21            | 0.43 | 0.00 | 0.07 | 0.00 | 0.00 | 0.00 | 0.14 | 0.14 |
| South A. Natal             | 0.25                     | 0.18 | 0.07 | 0.00 | 0.11 | 0.39 | 0.21                | 0.54 | 0.25 | 0.04            | 0.29 | 0.00 | 0.04 | 0.04 | 0.00 | 0.04 | 0.32 | 0.25 |
| Unknown                    | 0.21                     | 0.24 | 0.03 | 0.11 | 0.08 | 0.34 | 0.13                | 0.63 | 0.24 | 0.11            | 0.08 | 0.00 | 0.11 | 0.00 | 0.00 | 0.08 | 0.37 | 0.26 |
| USA                        | 0.17                     | 0.23 | 0.01 | 0.09 | 0.13 | 0.37 | 0.14                | 0.50 | 0.36 | 0.19            | 0.23 | 0.01 | 0.07 | 0.00 | 0.01 | 0.01 | 0.24 | 0.23 |
| All                        | 0.24                     | 0.17 | 0.05 | 0.07 | 0.08 | 0.40 | 0.19                | 0.62 | 0.18 | 0.19            | 0.19 | 0.01 | 0.06 | 0.04 | 0.01 | 0.02 | 0.25 | 0.23 |

Supplemental Table 3 continued

| Location                   | Relative shape of ligule |      |      |      |      |      |      |      |      | Presence or Absence of<br>stalk corky cracks |      | Presence or absence of stalk corky Patches |      |
|----------------------------|--------------------------|------|------|------|------|------|------|------|------|----------------------------------------------|------|--------------------------------------------|------|
|                            | 1                        | 2    | 3    | 4    | 5    | 6    | 7    | 8    | 11   | 1                                            | 2    | 1                                          | 2    |
| Amhara                     | 0.03                     | 0.03 | 0.01 | 0.12 | 0.26 | 0.22 | 0.14 | 0.18 | 0.00 | 0.09                                         | 0.91 | 0.83                                       | 0.17 |
| Benshangul G.              | 0.10                     | 0.00 | 0.00 | 0.00 | 0.40 | 0.00 | 0.20 | 0.30 | 0.00 | 0.20                                         | 0.80 | 1.00                                       | 0.00 |
| Gambella                   | 0.17                     | 0.00 | 0.00 | 0.00 | 0.33 | 0.00 | 0.17 | 0.33 | 0.00 | 0.00                                         | 1.00 | 1.00                                       | 0.00 |
| Harari                     | 0.00                     | 0.00 | 0.00 | 0.00 | 0.25 | 0.50 | 0.00 | 0.25 | 0.00 | 0.00                                         | 1.00 | 0.25                                       | 0.75 |
| Oromia                     | 0.10                     | 0.07 | 0.02 | 0.07 | 0.26 | 0.25 | 0.04 | 0.18 | 0.02 | 0.13                                         | 0.87 | 0.76                                       | 0.24 |
| SNNP                       | 0.13                     | 0.02 | 0.04 | 0.09 | 0.19 | 0.21 | 0.09 | 0.20 | 0.04 | 0.11                                         | 0.89 | 0.86                                       | 0.14 |
| Somali                     | 0.17                     | 0.00 | 0.00 | 0.00 | 0.17 | 0.33 | 0.00 | 0.33 | 0.00 | 0.00                                         | 1.00 | 0.33                                       | 0.67 |
| Tigray                     | 0.07                     | 0.00 | 0.07 | 0.00 | 0.57 | 0.14 | 0.07 | 0.07 | 0.00 | 0.07                                         | 0.93 | 1.00                                       | 0.00 |
| Australia<br>(Queens land) | 0.00                     | 0.00 | 0.25 | 0.00 | 0.50 | 0.00 | 0.00 | 0.25 | 0.00 | 0.00                                         | 1.00 | 0.75                                       | 0.25 |
| Barbados                   | 0.04                     | 0.03 | 0.05 | 0.09 | 0.24 | 0.11 | 0.21 | 0.23 | 0.01 | 0.04                                         | 0.96 | 0.88                                       | 0.13 |
| Brazil (Campos)            | 0.08                     | 0.08 | 0.00 | 0.00 | 0.25 | 0.42 | 0.08 | 0.08 | 0.00 | 0.08                                         | 0.92 | 0.92                                       | 0.08 |
| Cuba                       | 0.00                     | 0.00 | 0.00 | 0.10 | 0.30 | 0.30 | 0.10 | 0.20 | 0.00 | 0.00                                         | 1.00 | 0.80                                       | 0.20 |
| Guyana<br>(Demerara)       | 0.00                     | 0.06 | 0.00 | 0.31 | 0.13 | 0.13 | 0.25 | 0.13 | 0.00 | 0.13                                         | 0.88 | 0.88                                       | 0.13 |
| India                      | 0.04                     | 0.02 | 0.04 | 0.08 | 0.26 | 0.15 | 0.27 | 0.13 | 0.02 | 0.05                                         | 0.95 | 0.86                                       | 0.14 |
| Mauritius                  | 0.06                     | 0.00 | 0.06 | 0.00 | 0.31 | 0.25 | 0.06 | 0.25 | 0.00 | 0.06                                         | 0.94 | 0.88                                       | 0.13 |
| Mexico                     | 0.00                     | 0.00 | 0.00 | 0.00 | 0.42 | 0.17 | 0.33 | 0.08 | 0.00 | 0.25                                         | 0.75 | 0.75                                       | 0.25 |
| Puertorico                 | 0.07                     | 0.00 | 0.07 | 0.14 | 0.14 | 0.36 | 0.14 | 0.07 | 0.00 | 0.14                                         | 0.86 | 0.93                                       | 0.07 |
| South A. Natal             | 0.07                     | 0.00 | 0.07 | 0.04 | 0.36 | 0.14 | 0.11 | 0.18 | 0.04 | 0.18                                         | 0.82 | 0.82                                       | 0.18 |
| Unknown                    | 0.08                     | 0.00 | 0.00 | 0.11 | 0.26 | 0.21 | 0.18 | 0.13 | 0.03 | 0.05                                         | 0.95 | 0.89                                       | 0.11 |
| USA                        | 0.09                     | 0.01 | 0.00 | 0.19 | 0.29 | 0.03 | 0.20 | 0.19 | 0.01 | 0.10                                         | 0.90 | 0.89                                       | 0.11 |
| All                        | 0.07                     | 0.03 | 0.03 | 0.09 | 0.26 | 0.18 | 0.15 | 0.18 | 0.02 | 0.09                                         | 0.91 | 0.85                                       | 0.16 |

Supplemental Table 3 continued

| Location                   | Presence or<br>absence of<br>stalk growth<br>cracks |      | Presence or<br>absence of<br>bud groove |      | Color of the exposed rind |      |      |      |      |      |      |      |      |      |      |      |      |      |      |  |  |
|----------------------------|-----------------------------------------------------|------|-----------------------------------------|------|---------------------------|------|------|------|------|------|------|------|------|------|------|------|------|------|------|--|--|
|                            |                                                     |      |                                         |      |                           |      |      |      |      |      |      |      |      |      |      |      |      |      |      |  |  |
|                            | 1                                                   | 6    | 1                                       | 4    | 1                         | 2    | 3    | 4    | 5    | 6    | 8    | 10   | 11   | 12   | 13   | 14   | 15   | 16   | 17   |  |  |
| Amhara                     | 0.83                                                | 0.17 | 0.63                                    | 0.37 | 0.00                      | 0.04 | 0.00 | 0.18 | 0.04 | 0.01 | 0.01 | 0.07 | 0.03 | 0.00 | 0.21 | 0.09 | 0.05 | 0.22 | 0.04 |  |  |
| Benshangul G               | 0.60                                                | 0.40 | 0.50                                    | 0.50 | 0.00                      | 0.20 | 0.00 | 0.20 | 0.00 | 0.00 | 0.00 | 0.20 | 0.10 | 0.00 | 0.10 | 0.10 | 0.00 | 0.10 | 0.00 |  |  |
| Gambella                   | 0.33                                                | 0.67 | 0.50                                    | 0.50 | 0.17                      | 0.00 | 0.00 | 0.00 | 0.17 | 0.00 | 0.00 | 0.17 | 0.00 | 0.00 | 0.17 | 0.17 | 0.00 | 0.00 | 0.17 |  |  |
| Harari                     | 0.75                                                | 0.25 | 0.75                                    | 0.25 | 0.00                      | 0.00 | 0.00 | 0.00 | 0.25 | 0.00 | 0.00 | 0.25 | 0.00 | 0.25 | 0.00 | 0.00 | 0.00 | 0.25 | 0.00 |  |  |
| Oromia                     | 0.85                                                | 0.15 | 0.53                                    | 0.47 | 0.02                      | 0.06 | 0.01 | 0.08 | 0.04 | 0.00 | 0.01 | 0.20 | 0.14 | 0.00 | 0.08 | 0.10 | 0.01 | 0.25 | 0.00 |  |  |
| SNNP                       | 0.70                                                | 0.30 | 0.46                                    | 0.54 | 0.04                      | 0.01 | 0.00 | 0.12 | 0.07 | 0.02 | 0.03 | 0.18 | 0.10 | 0.01 | 0.11 | 0.07 | 0.01 | 0.21 | 0.04 |  |  |
| Somali                     | 1.00                                                | 0.00 | 0.50                                    | 0.50 | 0.00                      | 0.00 | 0.00 | 0.00 | 0.00 | 0.00 | 0.00 | 0.33 | 0.00 | 0.00 | 0.00 | 0.00 | 0.00 | 0.67 | 0.00 |  |  |
| Tigray                     | 0.29                                                | 0.71 | 0.36                                    | 0.64 | 0.00                      | 0.00 | 0.00 | 0.00 | 0.00 | 0.00 | 0.00 | 0.71 | 0.29 | 0.00 | 0.00 | 0.00 | 0.00 | 0.00 | 0.00 |  |  |
| Australia<br>(Queens land) | 1.00                                                | 0.00 | 0.50                                    | 0.50 | 0.00                      | 0.00 | 0.00 | 0.00 | 0.00 | 0.00 | 0.00 | 0.50 | 0.00 | 0.00 | 0.25 | 0.00 | 0.00 | 0.25 | 0.00 |  |  |
| Barbados                   | 0.79                                                | 0.21 | 0.29                                    | 0.71 | 0.01                      | 0.08 | 0.03 | 0.05 | 0.18 | 0.03 | 0.04 | 0.05 | 0.20 | 0.01 | 0.12 | 0.10 | 0.04 | 0.06 | 0.01 |  |  |
| Brazil (Campos)            | 0.83                                                | 0.17 | 0.33                                    | 0.67 | 0.00                      | 0.08 | 0.00 | 0.00 | 0.08 | 0.00 | 0.08 | 0.08 | 0.42 | 0.00 | 0.08 | 0.08 | 0.00 | 0.08 | 0.00 |  |  |
| Cuba                       | 0.90                                                | 0.10 | 0.40                                    | 0.60 | 0.00                      | 0.20 | 0.00 | 0.00 | 0.10 | 0.00 | 0.00 | 0.10 | 0.20 | 0.00 | 0.00 | 0.20 | 0.10 | 0.10 | 0.00 |  |  |
| Guyana<br>(Demerara)       | 0.81                                                | 0.19 | 0.25                                    | 0.75 | 0.00                      | 0.13 | 0.00 | 0.13 | 0.25 | 0.00 | 0.00 | 0.06 | 0.19 | 0.00 | 0.00 | 0.13 | 0.00 | 0.13 | 0.00 |  |  |
| India                      | 0.76                                                | 0.24 | 0.18                                    | 0.82 | 0.00                      | 0.13 | 0.06 | 0.06 | 0.12 | 0.04 | 0.01 | 0.04 | 0.07 | 0.04 | 0.04 | 0.20 | 0.03 | 0.14 | 0.01 |  |  |
| Mauritius                  | 0.81                                                | 0.19 | 0.31                                    | 0.69 | 0.00                      | 0.00 | 0.00 | 0.00 | 0.13 | 0.00 | 0.00 | 0.00 | 0.19 | 0.00 | 0.00 | 0.19 | 0.06 | 0.44 | 0.00 |  |  |
| Mexico                     | 0.50                                                | 0.50 | 0.00                                    | 1.00 | 0.00                      | 0.00 | 0.00 | 0.17 | 0.33 | 0.00 | 0.00 | 0.00 | 0.17 | 0.00 | 0.08 | 0.17 | 0.00 | 0.08 | 0.00 |  |  |
| Puertorico                 | 0.43                                                | 0.57 | 0.43                                    | 0.57 | 0.00                      | 0.14 | 0.00 | 0.14 | 0.14 | 0.07 | 0.14 | 0.00 | 0.07 | 0.00 | 0.07 | 0.00 | 0.07 | 0.07 | 0.07 |  |  |
| South A. Natal             | 0.82                                                | 0.18 | 0.11                                    | 0.89 | 0.00                      | 0.14 | 0.00 | 0.00 | 0.29 | 0.00 | 0.04 | 0.07 | 0.07 | 0.00 | 0.07 | 0.18 | 0.04 | 0.04 | 0.07 |  |  |
| Unknown                    | 0.82                                                | 0.18 | 0.26                                    | 0.74 | 0.00                      | 0.08 | 0.00 | 0.03 | 0.18 | 0.03 | 0.03 | 0.08 | 0.16 | 0.05 | 0.08 | 0.11 | 0.03 | 0.16 | 0.00 |  |  |
| USA                        | 0.81                                                | 0.19 | 0.26                                    | 0.74 | 0.03                      | 0.10 | 0.03 | 0.01 | 0.16 | 0.03 | 0.00 | 0.04 | 0.23 | 0.03 | 0.07 | 0.16 | 0.01 | 0.10 | 0.00 |  |  |
| All                        | 0.77                                                | 0.23 | 0.37                                    | 0.63 | 0.01                      | 0.07 | 0.02 | 0.08 | 0.12 | 0.02 | 0.02 | 0.11 | 0.13 | 0.02 | 0.09 | 0.12 | 0.03 | 0.16 | 0.02 |  |  |
